# Supplementary material for: Repairable photoactive polymer systems via metal–terpyridine-based self-assembly
Source: Royal Society of Chemistry journal article supplement (doi:10.1039/c7py00095b), 2017-01-01
Supplement: c7py00095b1.pdf [file c7py00095b1.pdf]

## Electronic Supplementary Information

### Repairable photoactive polymer systems via metal-terpyridine-based self-assembly

*Dong-Cheol Jeong, Jookyeong Lee, Yu Hyeon Ro and Changsik Song\**

Department of Chemistry, Sungkyunkwan University, 2066 Seobu-ro, Jangan-gu, Suwon,  
Gyeonggi 16419, Republic of Korea.

E-mail:songcs@skku.edu

- ✓ **Figure S1.** Absorption of tpy-polymer and Ru(bpy)<sub>2</sub>bpy-tpy
- ✓ **Figure S2.** Conversion calculation of benzylimine using <sup>1</sup>H-NMR spectra with time in Mg-gel and assign of benzylimine from produced photocatalysis.
- ✓ **Figure S3.** Comparison of photocatalytic amine to imine conversion with self-assembled gel by Mg<sup>2+</sup> and Fe<sup>2+</sup>.
- ✓ **Figure S4.** Proposed mechanisms of photoinduced oxidation of benzylamine to benzylbenzaldimine.
- ✓ **Figure S5.** Image of a redox titration using a KI/starch solution.
- ✓ **Figure S6.** Comparison of <sup>1</sup>H-NMR spectra to confirm the generation of superoxide.
- ✓ **Figure S7.** Comparison mechanism of electron transfer between Fe-tpy<sub>2</sub> complex and Mg-tpy<sub>2</sub> complex.
- ✓ **Figure S8.** UV-vis absorption of tpy functionalized polymer and MWNTs hybrid films.
- ✓ **Figure S9.** FT-IR spectra of norbornene derivative (compound 1,3 and 4) , P1 and P2.
- ✓ **Figure S10~13.** <sup>1</sup>H-NMR spectrum of compound 1~4 and P1.
- ✓ **Figure S14.** <sup>13</sup>C-NMR spectrum of compound 4.
- ✓ **Figure S15.** <sup>1</sup>H-NMR spectrum of P1.

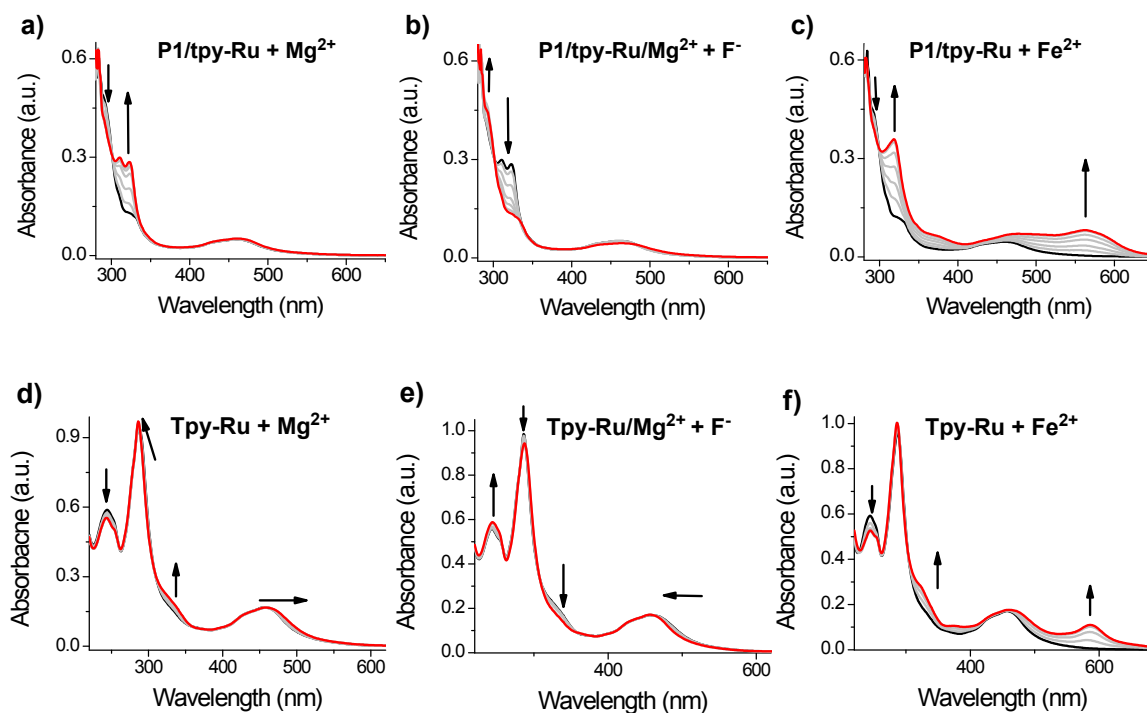

**Figure S1.** (a-c) UV-vis absorption spectra of tpy-polymer P1 (0.1 mg) and tpy-Ru (0.01 mg) in THF (3 mL) with addition of  $Mg^{2+}$  (a) or  $Fe^{2+}$  (c) (1 mM, 5- $\mu$ L intervals) (assembly), and subsequent addition of TBAF (10 mM, 1- $\mu$ L intervals) in a (b, disassembly). (d-f) UV-vis absorption spectra of tpy-Ru (10  $\mu$ M) in THF with addition of  $Mg^{2+}$  (d) or  $Fe^{2+}$  (f) (1 mM, 5- $\mu$ L intervals) (assembly), and subsequent addition of TBAF (10 mM, 1- $\mu$ L intervals) in d (e, disassembly).

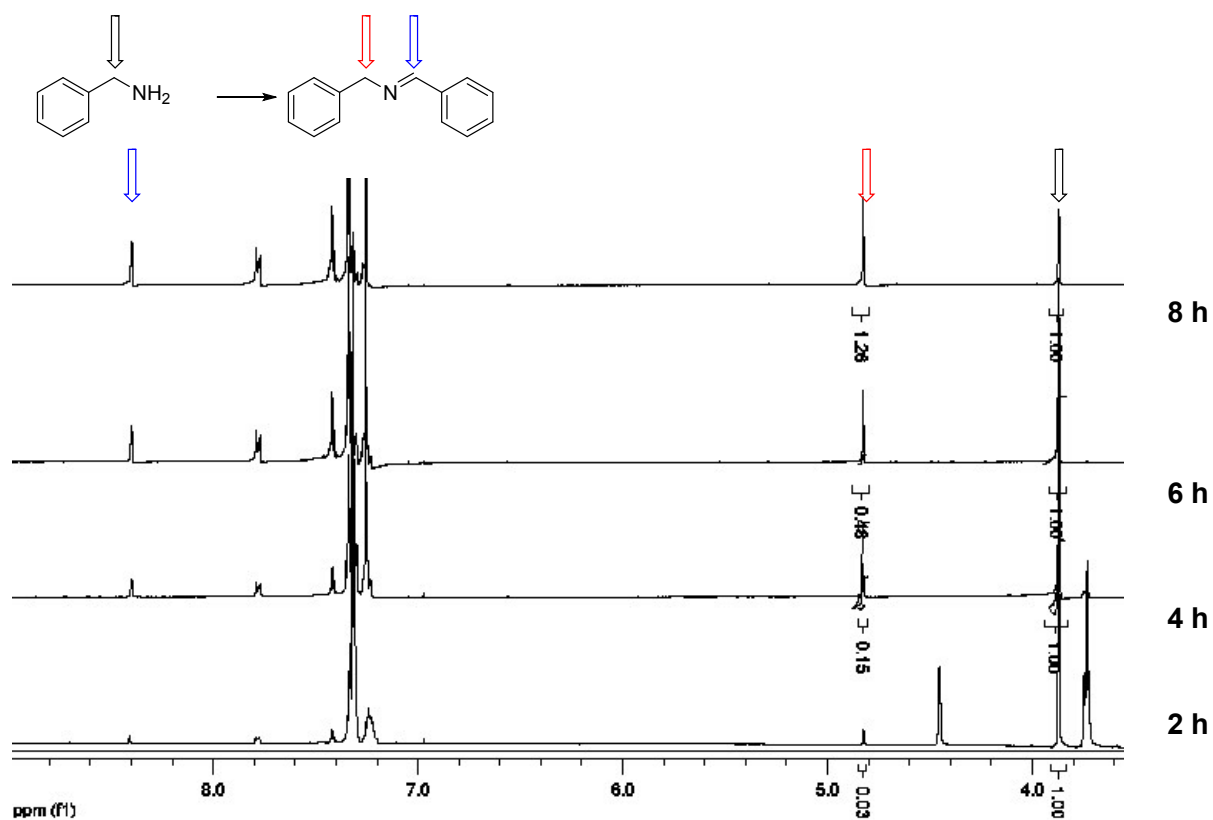

**Figure S2.** <sup>1</sup>H-NMR spectra with time in P1/tpy-Ru with Mg<sup>2+</sup> showing the photocatalytic conversion of benzylamine to benzylbenzaldimine.

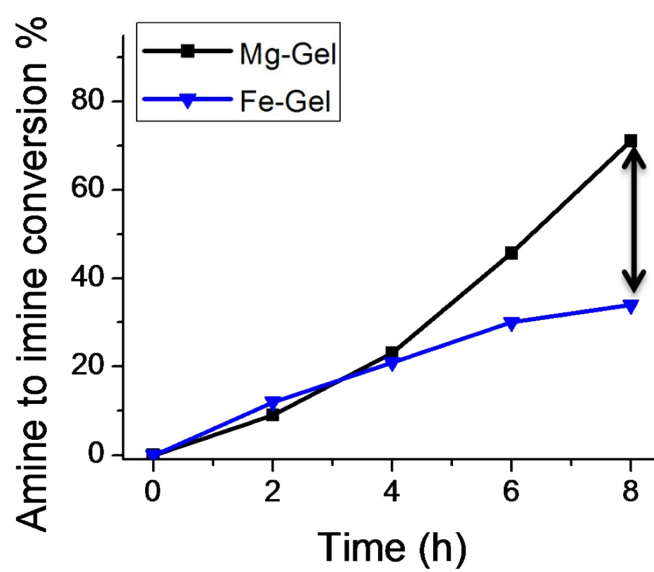

**Figure S3.** Comparison of conversion rates in photocatalytic oxidation of amine to imine with self-assembled gels P1/tpy-Ru with  $\text{Mg}^{2+}$  and  $\text{Fe}^{2+}$ .

a)

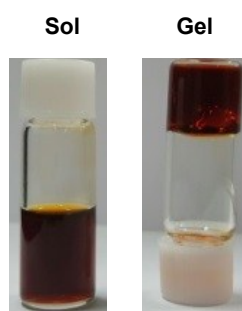

b)

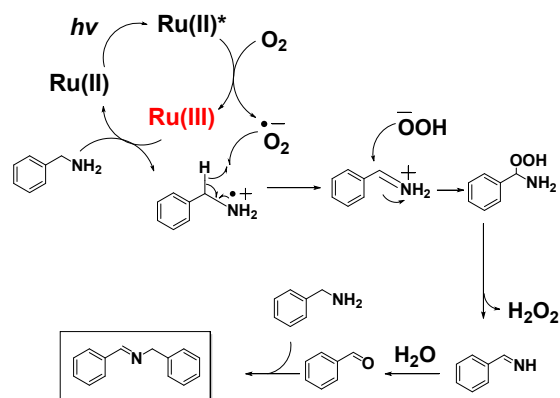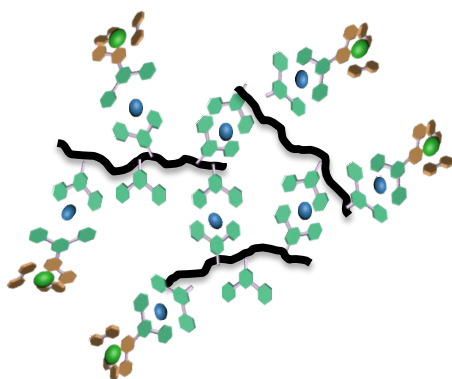

c)

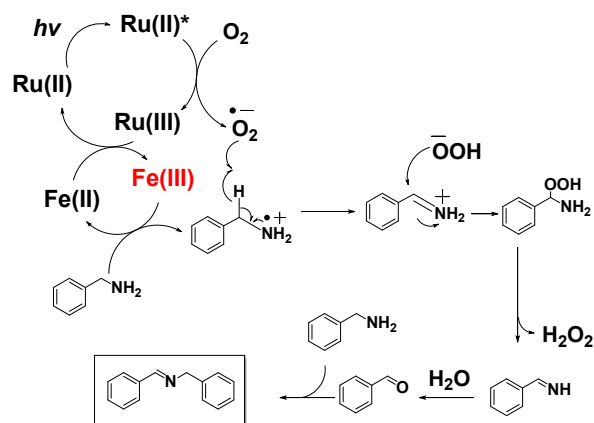

**Figure S4.** (a) Sol-gel phase change of P1 with  $\text{Mg}^{2+}$ . (b, c) Proposed mechanisms of photoinduced oxidation of benzylamine to benzylbenzaldimine in tpy-Ru/Mg(II) complex (b) and in tpy-Ru/Fe(II) complex (c).

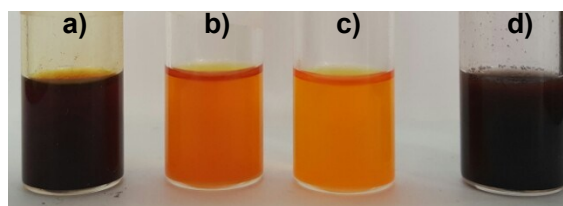

**Figure S5.** (a) Image of a redox titration using a KI/starch solution, which consists of starch (5 mg), 0.1 M KI, and 0.1 M acetic acid, for generation of hydrogen peroxide in photoinduced oxidative coupling of benzylamine (122 mM) to benzylbenzaldimine with  $\text{Ru}(\text{bpy})_3\cdot 2\text{PF}_6$  (1 mol%) in 3 mL THF/ $\text{H}_2\text{O}$  (2:1) after irradiation for 12 h using a 455-nm LED lamp under air atmosphere. (b) Negative control without benzylamine. (c) Negative control without 455-nm irradiation. (d) Direct addition of  $\text{H}_2\text{O}_2$  (35%, 40  $\mu\text{L}$ ) to the KI/starch solution.

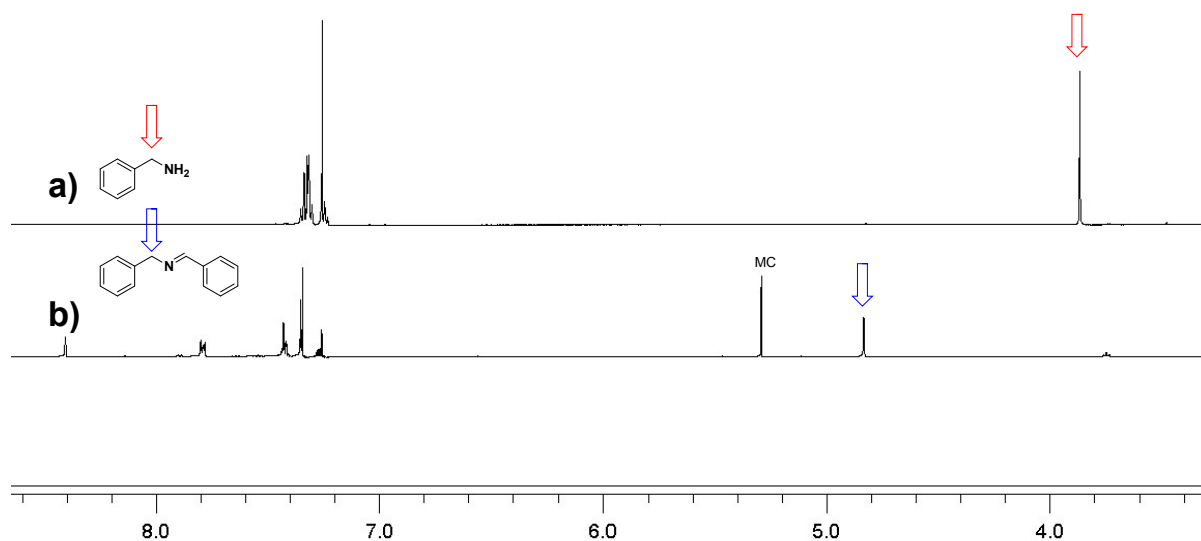

**Figure S6.** Comparison of  $^1\text{H}$ -NMR spectra to confirm the generation of superoxide ( $\text{O}_2^{\cdot -}$ ) in photoinduced oxidative coupling of benzylamine to benzylbenzaldimine. (a) In the presence of superoxide dismutase (SOD,  $\text{O}_2^{\cdot -}$  scavenger) in the photocatalytic reaction mixture, the yield was less than 1% using benzylamine (122 mM) and  $\text{Ru}(\text{bpy})_3\cdot 2\text{PF}_6$  (1 mol%) in 3 mL THF/ $\text{H}_2\text{O}$  (2:1) after irradiation for 12 h using a 455-nm LED lamp under air atmosphere. (b) Without SOD, the yield was ~99% under similar conditions.

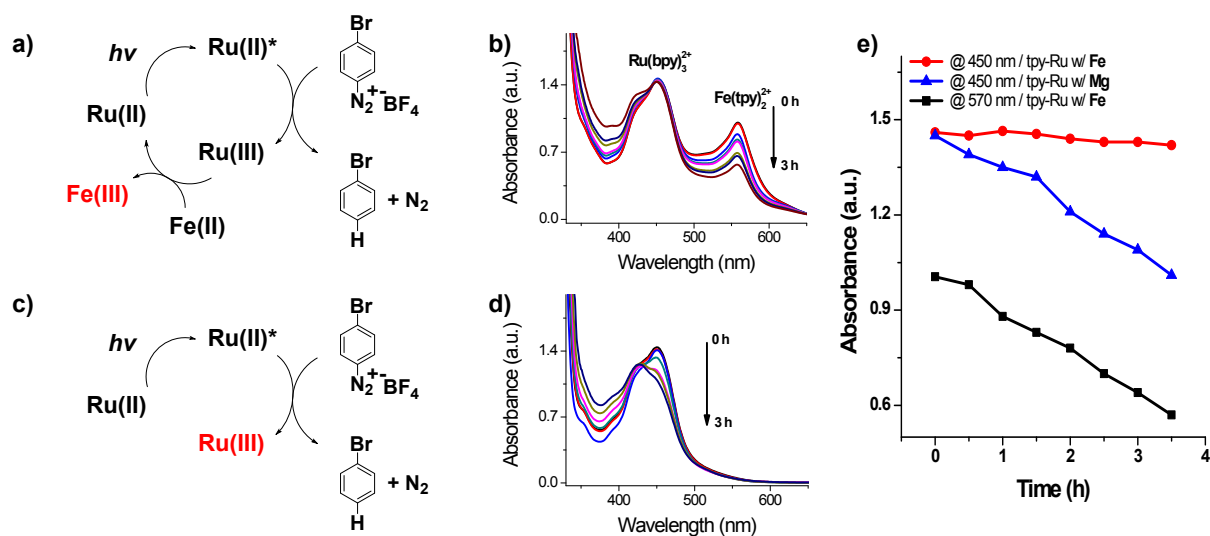

**Figure S7.** Comparisons of photoinduced electron transfer mechanism between a tpy-Ru/Fe(II) complex (a) and a tpy-Ru/Mg(II) complex (c) in the presence of an irreversible electron acceptor, 4-bromophenyl diazonium salt. Changes of UV-vis absorption spectra during the irradiation using assembled tpy-Ru/Fe(II) (b) and tpy-Ru/Mg(II) (d), and time-elapsed absorbance changes (e).

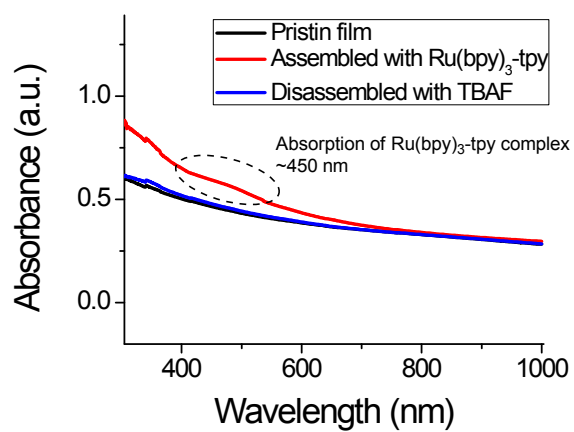

**Figure S8.** UV-vis absorption spectra of tpy-functionalized polymer P1 and tpy-MWNT hybrid film (black line), tpy-Ru assembled hybrid film with  $\text{Mg}^{2+}$  (red line), and disassembled hybrid film using TBAF (blue line).

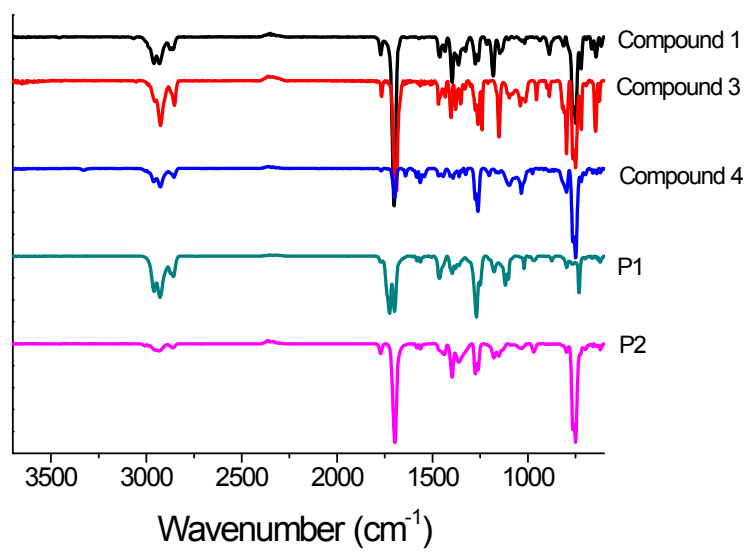

**Figure S9.** FT-IR spectra of norbornene derivatives, compounds 1, 3, 4, P1 and P2.

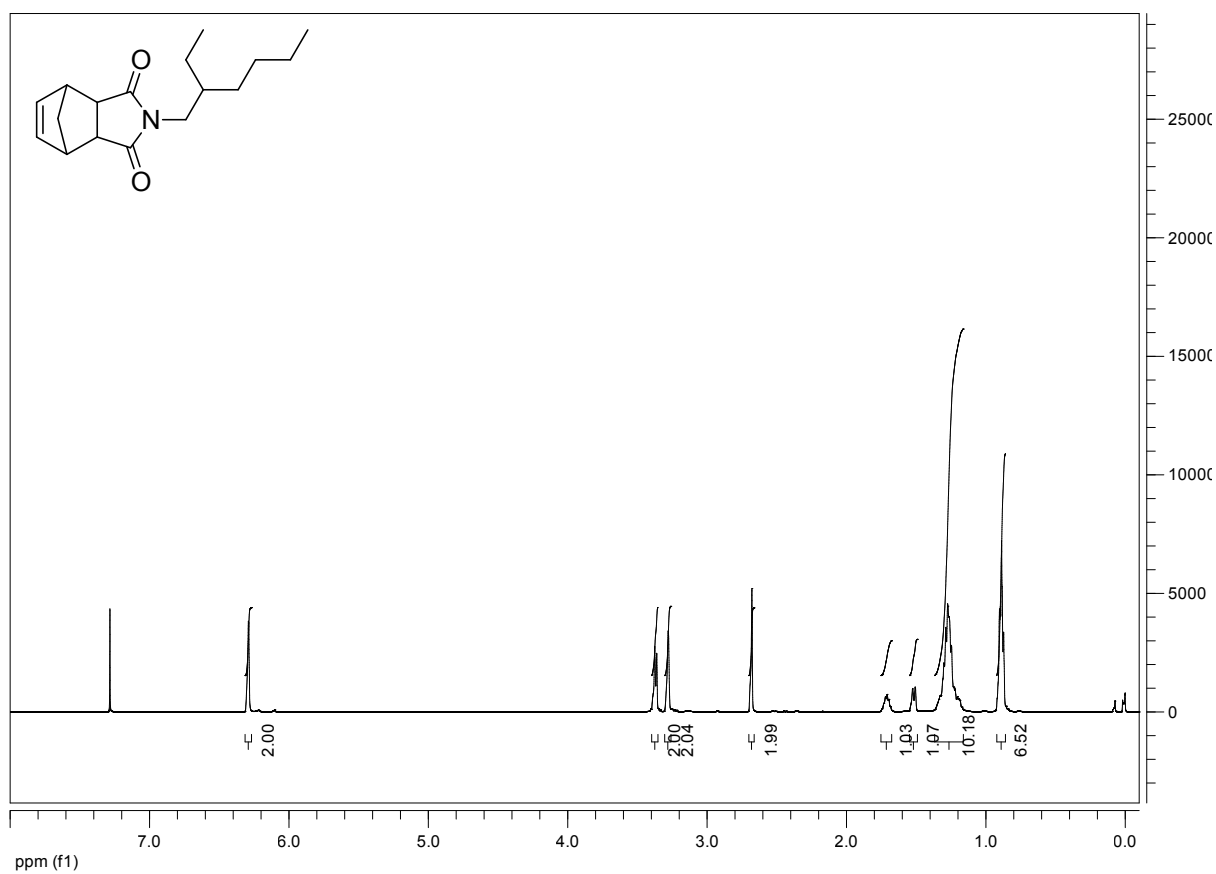

**Figure S10.** <sup>1</sup>H-NMR spectrum of compound **1**.

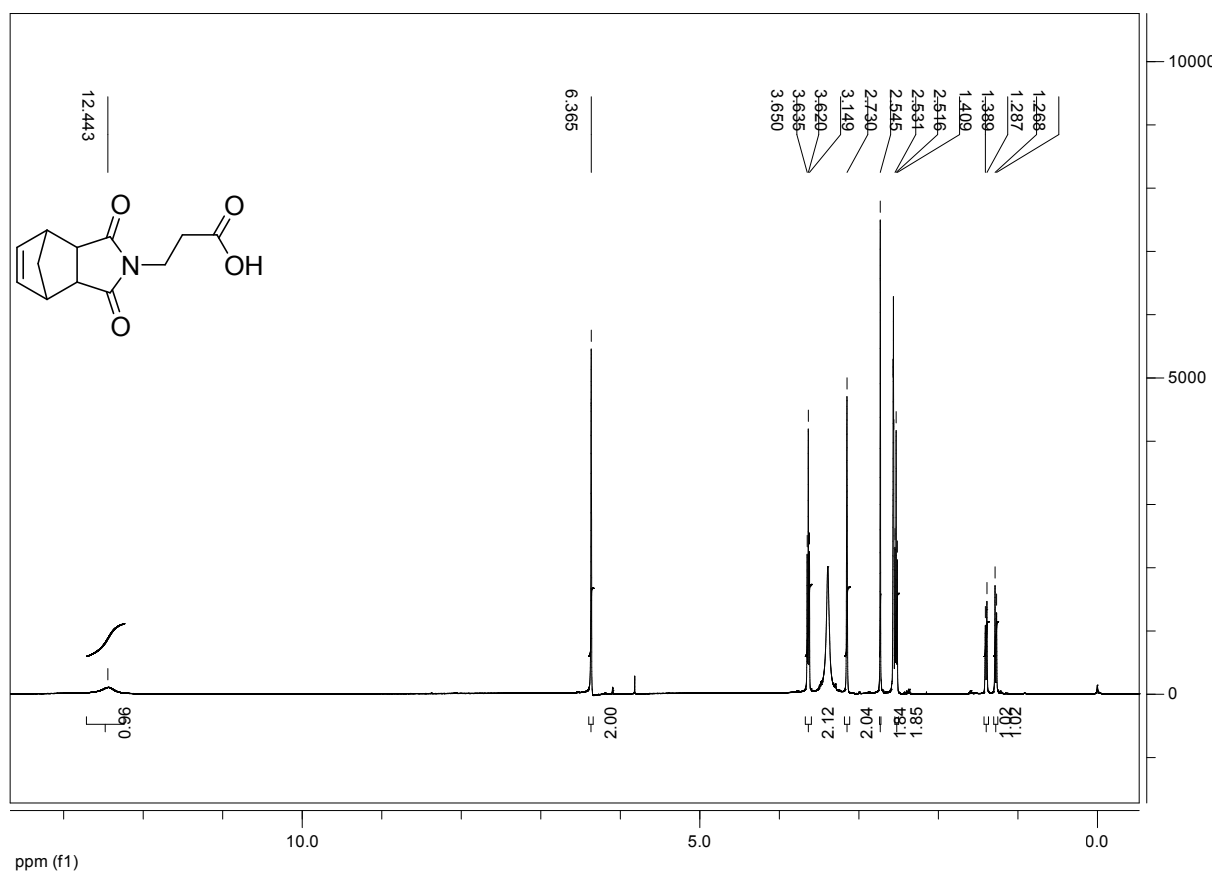

**Figure S11.** <sup>1</sup>H-NMR spectrum of compound **2**.

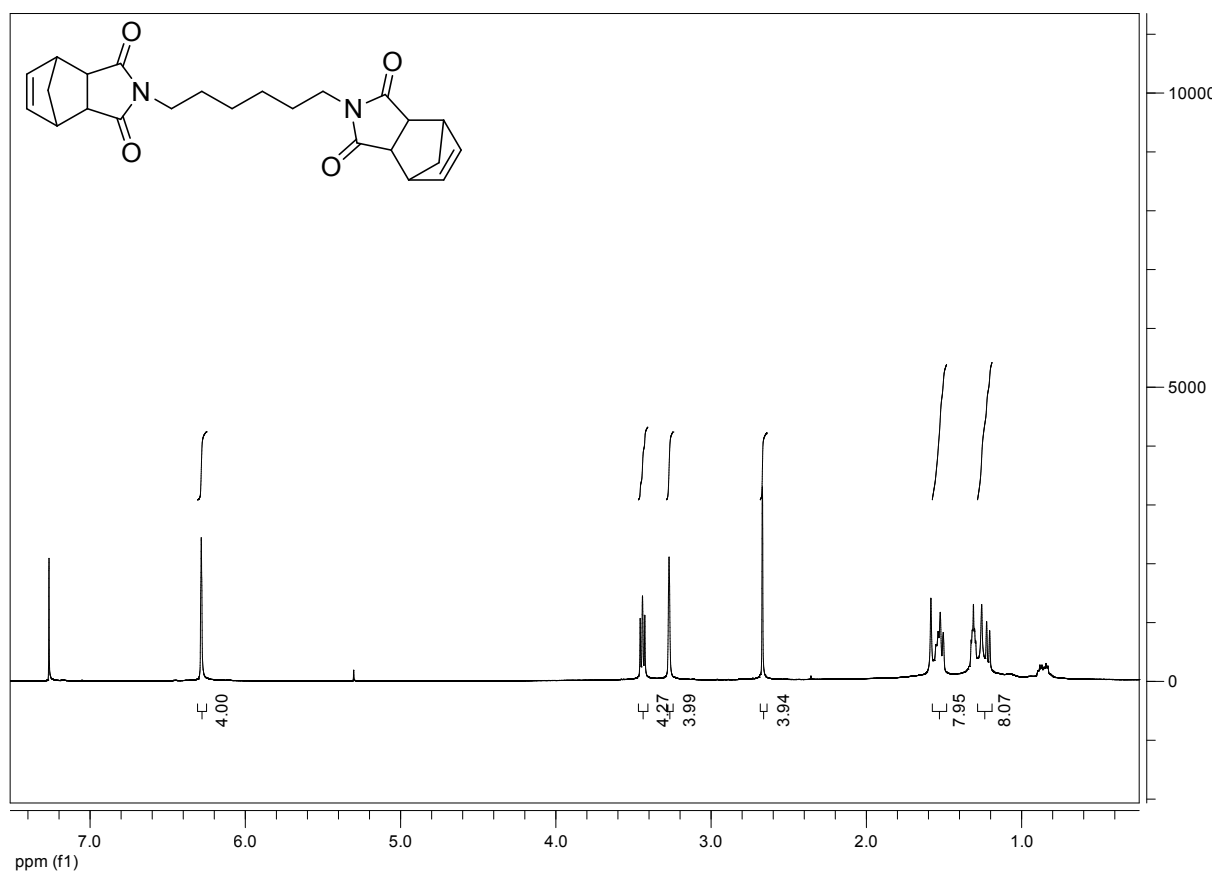

**Figure S12.** <sup>1</sup>H-NMR spectrum of compound 3.

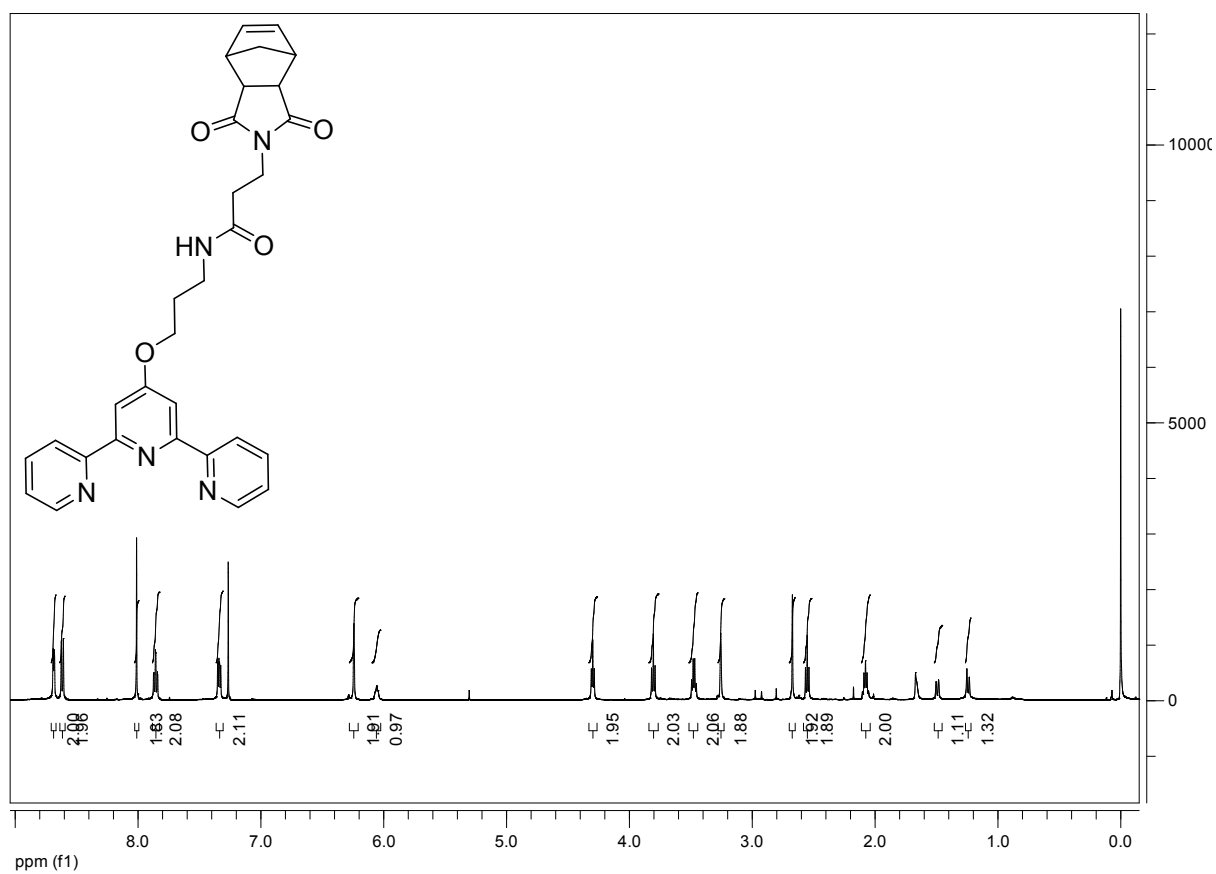

**Figure S13.** <sup>1</sup>H-NMR spectrum of compound 4.

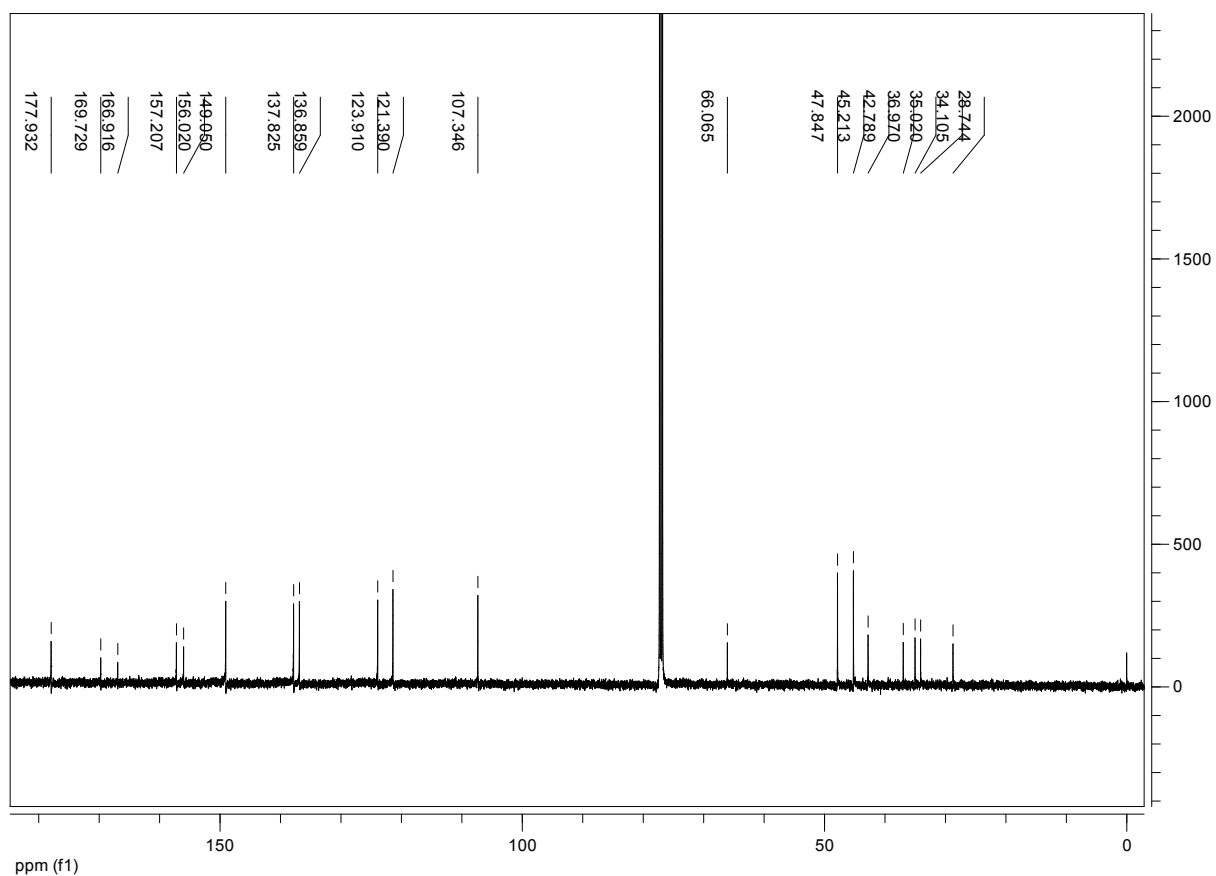

**Figure S14.** <sup>13</sup>C-NMR spectrum of compound 4.
